# Supplementary material for: Synthesis, structure, and corrosion inhibiting properties of REIII 3-thiophenecarboxylate complexes
Source: Royal Society of Chemistry journal article supplement (doi:10.1039/d2nj03556a), 2022-01-01
Supplement: d2nj03556a1.pdf [file d2nj03556a1.pdf]

## Supplementary Material

### Synthesis, structure, and corrosion inhibiting properties of RE<sup>III</sup> 3-thiophenecarboxylate complexes

Vidushi P. Vithana,<sup>a</sup> Zhifang Guo,<sup>a</sup> Glen B. Deacon,<sup>b</sup> Anthony E. Somers<sup>c</sup> and Peter C. Junk

<sup>a\*</sup>

<sup>a</sup>College of Science & Engineering, James Cook University, Townsville 4811, Qld, Australia.

<sup>b</sup>School of Chemistry, Monash University, Clayton 3800, Australia.

<sup>c</sup>Institute for Frontier Materials, Deakin University, Burwood 3125, Australia.

\*Corresponding author: peter.junk@jcu.edu.au

Content:

1. Single-Crystal X-Ray Diffraction Details
2. Bond lengths Tables
3. Hydrogen bond Geometry
4. Powder X-Ray Diffraction
5. Infra-Red Spectroscopy
6. Thermogravimetric Analysis
7. IR spectra of Ln<sub>2</sub>(CO<sub>3</sub>)<sub>3</sub> formed under TGA conditions
8. Weight loss experiments
9. Potentiodynamic Polarisation scans

**Table S1.** Crystal data and structural refinement for lanthanoid 3-thiophenecarboxylate complexes

|                                                    | <b>1a</b>                                                       | <b>1b</b>                                                       | <b>1c</b>                                                       | <b>1d</b>                                                       | <b>1e</b>                                                        | <b>1f</b>                                                       |
|----------------------------------------------------|-----------------------------------------------------------------|-----------------------------------------------------------------|-----------------------------------------------------------------|-----------------------------------------------------------------|------------------------------------------------------------------|-----------------------------------------------------------------|
|                                                    | [La(3TPC)(H <sub>2</sub> O) <sub>3</sub> ] <sub>n</sub>         | [Ce(3TPC)(H <sub>2</sub> O) <sub>3</sub> ] <sub>n</sub>         | [Pr(3TPC)(H <sub>2</sub> O) <sub>3</sub> ] <sub>n</sub>         | [Nd(3TPC)(H <sub>2</sub> O) <sub>3</sub> ] <sub>n</sub>         | [Sm(3TPC)(H <sub>2</sub> O) <sub>3</sub> ] <sub>n</sub>          | [Gd(3TPC)(H <sub>2</sub> O) <sub>3</sub> ] <sub>n</sub>         |
| Formula                                            | C <sub>15</sub> H <sub>15</sub> LaO <sub>9</sub> S <sub>3</sub> | C <sub>15</sub> H <sub>15</sub> CeO <sub>9</sub> S <sub>3</sub> | C <sub>15</sub> H <sub>15</sub> O <sub>9</sub> PrS <sub>3</sub> | C <sub>15</sub> H <sub>15</sub> NdO <sub>9</sub> S <sub>3</sub> | C <sub>15</sub> H <sub>15</sub> O <sub>9</sub> S <sub>3</sub> Sm | C <sub>15</sub> H <sub>15</sub> GdO <sub>9</sub> S <sub>3</sub> |
| <i>M<sub>r</sub></i>                               | 574.36                                                          | 575.57                                                          | 576.36                                                          | 579.69                                                          | 585.80                                                           | 592.70                                                          |
| Space group                                        | P2 <sub>1</sub> /c                                               | P2 <sub>1</sub> /c                                              |
| <i>a</i> (Å)                                       | 15.070(3)                                                       | 15.0999(6)                                                      | 15.059(3)                                                       | 15.020(3)                                                       | 15.042(3)                                                        | 14.960(3)                                                       |
| <i>b</i> (Å)                                       | 12.120(2)                                                       | 12.1722(4)                                                      | 12.157(2)                                                       | 12.070(2)                                                       | 12.055(2)                                                        | 12.000(2)                                                       |
| <i>c</i> (Å)                                       | 10.840(2)                                                       | 10.8103(3)                                                      | 10.775(2)                                                       | 10.720(2)                                                       | 10.666(2)                                                        | 10.600(2)                                                       |
| <i>α</i> (°)                                       | 90                                                              | 90                                                              | 90                                                              | 90                                                              | 90                                                               | 90                                                              |
| <i>β</i> (°)                                       | 100.41(3)                                                       | 100.769(3)                                                      | 100.81(3)                                                       | 100.78(3)                                                       | 101.00(3)                                                        | 101.07(3)                                                       |
| <i>γ</i> (°)                                       | 90                                                              | 90                                                              | 90                                                              | 90                                                              | 90                                                               | 90                                                              |
| <i>V</i> (Å <sup>3</sup> )                         | 1947.3(7)                                                       | 1951.93(12)                                                     | 1937.5(7)                                                       | 1909.1(7)                                                       | 1898.6(7)                                                        | 1867.5(7)                                                       |
| <i>Z</i>                                           | 4                                                               | 4                                                               | 4                                                               | 4                                                               | 4                                                                | 4                                                               |
| <i>ρ</i> <sub>calc</sub> , g cm <sup>-3</sup>      | 1.959                                                           | 1.959                                                           | 1.976                                                           | 2.017                                                           | 2.049                                                            | 2.108                                                           |
| <i>μ</i> , mm <sup>-1</sup>                        | 2.562                                                           | 2.699                                                           | 22.751                                                          | 3.095                                                           | 3.470                                                            | 3.935                                                           |
| <i>N<sub>τ</sub></i>                               | 41288                                                           | 11030                                                           | 3776                                                            | 3344                                                            | 3819                                                             | 39196                                                           |
| <i>N</i> ( <i>R</i> <sub>int</sub> )               | 3420 (0.0646)                                                   | 4592(0.0457)                                                    | 3776                                                            | 3344                                                            | 3819                                                             | 3298(0.0491)                                                    |
| <i>R</i> <sub>1</sub> ( <i>I</i> > 2σ( <i>I</i> )) | 0.0345                                                          | 0.0408                                                          | 0.0522                                                          | 0.0342                                                          | 0.0615                                                           | 0.0312                                                          |
| <i>wR</i> <sub>2</sub> (all data)                  | 0.0968                                                          | 0.0851                                                          | 0.1412                                                          | 0.1060                                                          | 0.1791                                                           | 0.0896                                                          |
| GOF                                                | 1.099                                                           | 1.034                                                           | 1.050                                                           | 1.080                                                           | 1.047                                                            | 1.037                                                           |

|                                                    | <b>2a</b>                                                                            | <b>2b</b>                                                                            | <b>2c</b>                                                                           | <b>2d</b>                                                                            | <b>2e</b>                                                                            |
|----------------------------------------------------|--------------------------------------------------------------------------------------|--------------------------------------------------------------------------------------|-------------------------------------------------------------------------------------|--------------------------------------------------------------------------------------|--------------------------------------------------------------------------------------|
|                                                    | <b>[Dy<sub>2</sub>(3TPC)<sub>3</sub>(H<sub>2</sub>O)<sub>4</sub>]·H<sub>2</sub>O</b> | <b>[Ho<sub>2</sub>(3TPC)<sub>3</sub>(H<sub>2</sub>O)<sub>4</sub>]·H<sub>2</sub>O</b> | <b>[Y<sub>2</sub>(3TPC)<sub>3</sub>(H<sub>2</sub>O)<sub>4</sub>]·H<sub>2</sub>O</b> | <b>[Er<sub>2</sub>(3TPC)<sub>3</sub>(H<sub>2</sub>O)<sub>4</sub>]·H<sub>2</sub>O</b> | <b>[Lu<sub>2</sub>(3TPC)<sub>3</sub>(H<sub>2</sub>O)<sub>4</sub>]·H<sub>2</sub>O</b> |
| Formula                                            | C <sub>30</sub> H <sub>28</sub> Dy <sub>2</sub> O <sub>17</sub> S <sub>6</sub>       | C <sub>30</sub> H <sub>28</sub> Ho <sub>2</sub> O <sub>17</sub> S <sub>6</sub>       | C <sub>30</sub> H <sub>28</sub> O <sub>17</sub> S <sub>6</sub> Y <sub>2</sub>       | C <sub>30</sub> H <sub>28</sub> Er <sub>2</sub> O <sub>17</sub> S <sub>6</sub>       | C <sub>30</sub> H <sub>28</sub> Lu <sub>2</sub> O <sub>17</sub> S <sub>6</sub>       |
| <i>M<sub>r</sub></i>                               | 1177.88                                                                              | 1182.74                                                                              | 1030.70                                                                             | 1187.40                                                                              | 1202.82                                                                              |
| Space group                                        | P2 <sub>1</sub> /c                                                                   | P2 <sub>1</sub> /c                                                                   | P2 <sub>1</sub> /c                                                                  | P2 <sub>1</sub> /c                                                                   | P2 <sub>1</sub> /n                                                                   |
| <i>a</i> (Å)                                       | 9.9091(7)                                                                            | 9.9388(6)                                                                            | 9.920(2)                                                                            | 9.9187(7)                                                                            | 9.8729(3)                                                                            |
| <i>b</i> (Å)                                       | 19.1194(7)                                                                           | 19.2401(11)                                                                          | 19.170(4)                                                                           | 19.1800(7)                                                                           | 19.2032(5)                                                                           |
| <i>c</i> (Å)                                       | 11.0210(7)                                                                           | 11.0949(8)                                                                           | 11.080(2)                                                                           | 11.0843(7)                                                                           | 11.0534(4)                                                                           |
| <i>α</i> (°)                                       | 90                                                                                   | 90                                                                                   | 90                                                                                  | 90                                                                                   | 90                                                                                   |
| <i>β</i> (°)                                       | 115.932(8)                                                                           | 116.176(8)                                                                           | 116.41(3)                                                                           | 116.458(8)                                                                           | 116.308(4)                                                                           |
| <i>γ</i> (°)                                       | 90                                                                                   | 90                                                                                   | 90                                                                                  | 90                                                                                   | 90                                                                                   |
| <i>V</i> (Å <sup>3</sup> )                         | 1877.8(2)                                                                            | 1904.0(2)                                                                            | 1887.1(8)                                                                           | 1887.8(2)                                                                            | 1878.57(12)                                                                          |
| <i>Z</i>                                           | 2                                                                                    | 2                                                                                    | 2                                                                                   | 2                                                                                    | 2                                                                                    |
| <i>ρ</i> <sub>calc</sub> , g cm <sup>-3</sup>      | 2.083                                                                                | 2.063                                                                                | 1.814                                                                               | 2.089                                                                                | 2.126                                                                                |
| <i>μ</i> , mm <sup>-1</sup>                        | 4.357                                                                                | 4.528                                                                                | 3.466                                                                               | 4.821                                                                                | 5.633                                                                                |
| <i>N<sub>τ</sub></i>                               | 12382                                                                                | 8447                                                                                 | 30379                                                                               | 36686                                                                                | 26278                                                                                |
| <i>N</i> ( <i>R</i> <sub>int</sub> )               | 3996(0.0339)                                                                         | 4364(0.0345)                                                                         | 3313(0.0407)                                                                        | 4315(0.0846)                                                                         | 5615(0.0460)                                                                         |
| <i>R</i> <sub>1</sub> ( <i>I</i> > 2σ( <i>I</i> )) | 0.0256                                                                               | 0.0484                                                                               | 0.0357                                                                              | 0.0235                                                                               | 0.0303                                                                               |
| <i>wR</i> <sub>2</sub> (all data)                  | 0.0581                                                                               | 0.0905                                                                               | 0.0978                                                                              | 0.0546                                                                               | 0.0620                                                                               |
| GOF                                                | 1.051                                                                                | 1.136                                                                                | 1.073                                                                               | 1.036                                                                                | 1.051                                                                                |



**Table S2.** Selected bond lengths and distances (Å) for the isostructural [Ln(3TPC)<sub>3</sub>(H<sub>2</sub>O)<sub>3</sub>]<sub>n</sub> series.

|              | La1 ( <b>1a</b> ) | Ce1 ( <b>1b</b> ) | Pr1 ( <b>1c</b> ) | Nd1 ( <b>1d</b> ) | Sm1 ( <b>1e</b> ) | Gd1 ( <b>1f</b> ) |
|--------------|-------------------|-------------------|-------------------|-------------------|-------------------|-------------------|
| RE1#1 =RE1#2 | 6.3117(9)         | 6.2961(3)         | 6.2763(9)         | 6.2360(9)         | 6.2060(9)         | 6.1655(9)         |
| O1           | 2.610(3)          | 2.598(3)          | 2.570(5)          | 2.529(4)          | 2.525(5)          | 2.478(4)          |
| O2           | 2.583(3)          | 2.552(3)          | 2.531(5)          | 2.553(3)          | 2.464(5)          | 2.494(3)          |
| O3           | 2.568(3)          | 2.602(3)          | 2.577(5)          | 2.555(4)          | 2.518(4)          | 2.451(3)          |
| O4           | 2.620(3)          | 2.550(3)          | 2.523(5)          | 2.502(3)          | 2.499(5)          | 2.514(3)          |
| O5           | 2.501(3)          | 2.484(3)          | 2.468(5)          | 2.464(3)          | 2.430(4)          | 2.413(3)          |
| O6#1         | 2.510(3)          | 2.504(3)          | 2.489(5)          | 2.456(3)          | 2.441(4)          | 2.421(3)          |
| O7           | 2.577(3)          | 2.518(3)          | 2.538(5)          | 2.461(3)          | 2.434(5)          | 2.410(3)          |
| O8           | 2.524(3)          | 2.499(3)          | 2.485(5)          | 2.469(3)          | 2.452(4)          | 2.418(3)          |
| O9           | 2.518(3)          | 2.557(3)          | 2.495(5)          | 2.523(3)          | 2.493(4)          | 2.471(3)          |

**Table S3.** Hydrogen bonds for [Pr(3TPC)<sub>3</sub>(H<sub>2</sub>O)<sub>3</sub>]<sub>n</sub> (**1c**) [d/Å and </°].

| D-H...A         | d(D-H) | d(H...A) | d(D...A) | <(DHA)  |
|-----------------|--------|----------|----------|---------|
| O7#1-H7B#1...O5 | 0.8699 | 2.2476   | 2.9587   | 138.882 |
| C10-H10...O2    | 0.9502 | 2.1510   | 3.0093   | 149.599 |

**Table S4.** Selected bond lengths and distances (Å) for the isostructural [Ln<sub>2</sub>(3TPC)<sub>6</sub>(H<sub>2</sub>O)<sub>4</sub>].H<sub>2</sub>O series.

|              | Dy1 ( <b>2a</b> ) | Ho1 ( <b>2b</b> ) | Y1 ( <b>2c</b> ) | Er1 ( <b>2d</b> ) | Lu1 ( <b>2e</b> ) |
|--------------|-------------------|-------------------|------------------|-------------------|-------------------|
| RE1#1 =RE1#2 | 4.3346(5)         | 4.4325(6)         | 4.4708(10)       | 4.4809(4)         | 4.5153(2)         |
| O1           | 2.446(2)          | 2.435(4)          | 2.405(19)        | 2.426(2)          | 2.367(2)          |
| O2           | 2.423(2)          | 2.410(4)          | 2.435(2)         | 2.398(2)          | 2.409(2)          |
| O3           | 2.459(2)          | 2.455(4)          | 2.437(2)         | 2.433(2)          | 2.368(2)          |
| O4           | 2.400(2)          | 2.401(4)          | 2.402(19)        | 2.394(2)          | 2.396(2)          |
| O5           | 2.285(3)          | 2.249(4)          | 2.235(2)         | 2.229(2)          | 2.187(2)          |
| O6#1         | 2.325(2)          | 2.294(5)          | 2.290(2)         | 2.283(2)          | 2.240(3)          |
| O7           | 2.325(2)          | 2.395(4)          | 2.392(2)         | 2.385(2)          | 2.299(2)          |
| O8           | 2.361(2)          | 2.342(4)          | 2.341(18)        | 2.330(2)          | 2.355(2)          |

**Table S5.** Hydrogen bonds for  $[\text{Er}_2(3\text{TPC})_6(\text{H}_2\text{O})_4]\cdot\text{H}_2\text{O}$  (**2d**) [d/Å and </math>°].

| D-H...A        | d(D-H)    | d(H...A)  | d(D...A)  | <(DHA)      |
|----------------|-----------|-----------|-----------|-------------|
| O7-H7B ...O9   | 0.8628(2) | 1.9557(6) | 2.7291(6) | 148.551(2)  |
| O7-H7A ...O4#1 | 0.8615(2) | 1.8623(2) | 2.7107(3) | 167.887(16) |

### Powder X-Ray Diffraction

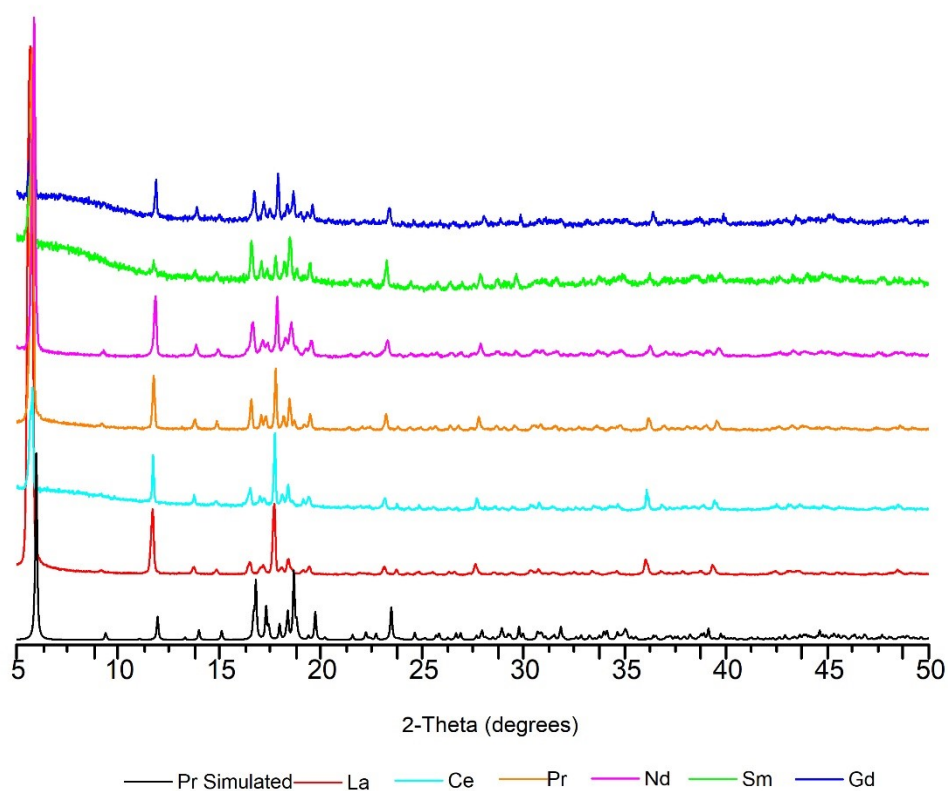

**Figure S1.** PXRD traces of the  $[\text{Ln}(3\text{TPC})_3(\text{H}_2\text{O})_3]$  (**1a-f**) series at room temperature compared to the simulated pattern of  $[\text{Pr}(3\text{TPC})_3(\text{H}_2\text{O})_3]_n$  (**1c**)

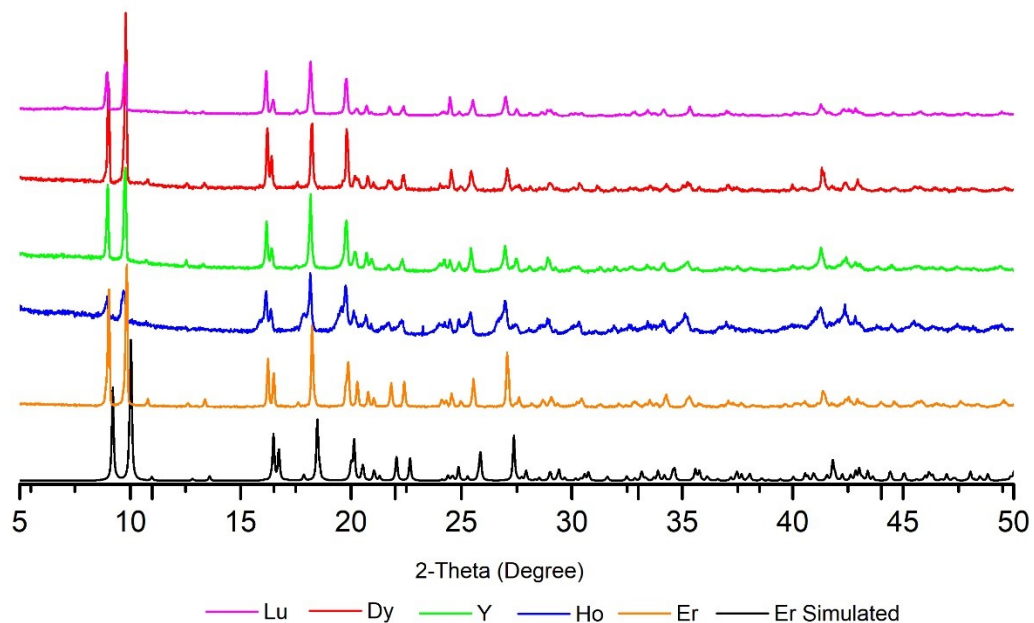

**Figure S2.** PXRD traces of the  $[\text{Ln}_2(3\text{TPC})_6(\text{H}_2\text{O})_4]\cdot\text{H}_2\text{O}$  (**2a-e**) series at room temperature compared to the simulated pattern of  $[\text{Er}_2(3\text{TPC})_6(\text{H}_2\text{O})_4]\cdot\text{H}_2\text{O}$  (**2d**)

### Infrared Spectroscopy

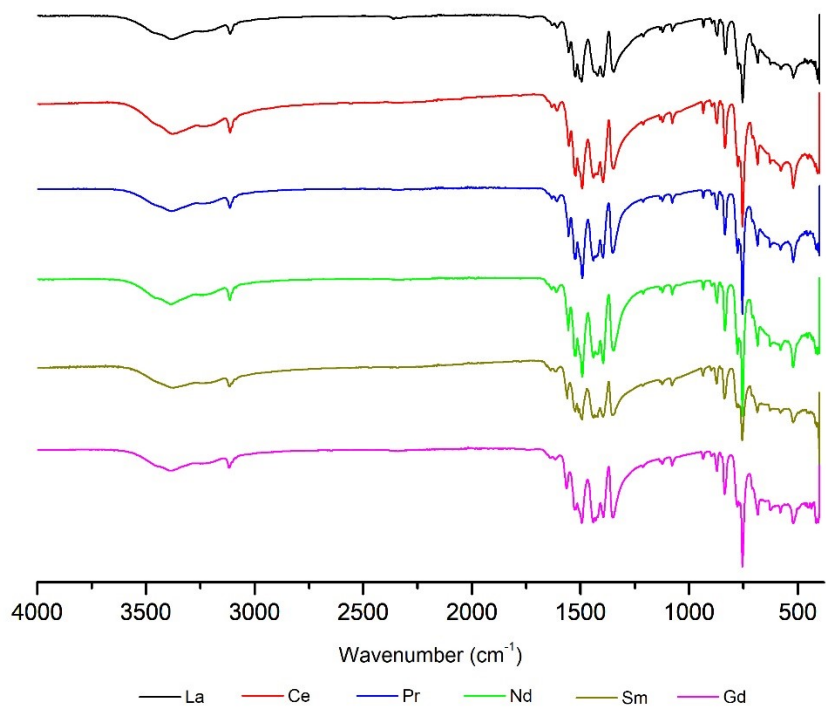

**Figure S3.** IR spectra of  $[\text{Ln}(3\text{TPC})_3(\text{H}_2\text{O})_3]_n$  (**1a-f**) series

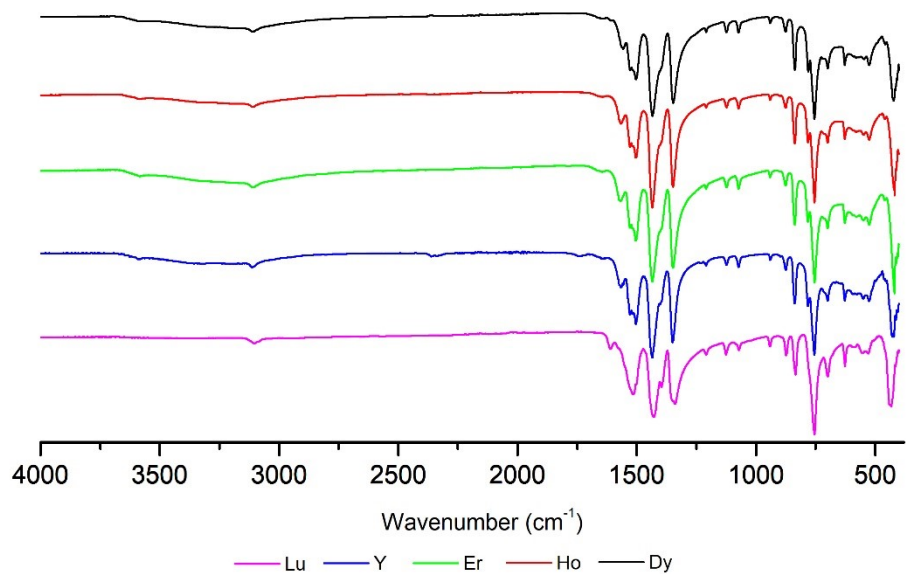

**Figure S4.** IR spectra of  $[\text{Ln}_2(3\text{TPC})_6(\text{H}_2\text{O})_4]\cdot\text{H}_2\text{O}$  (**2a-e**) series

### Thermogravimetric Analysis

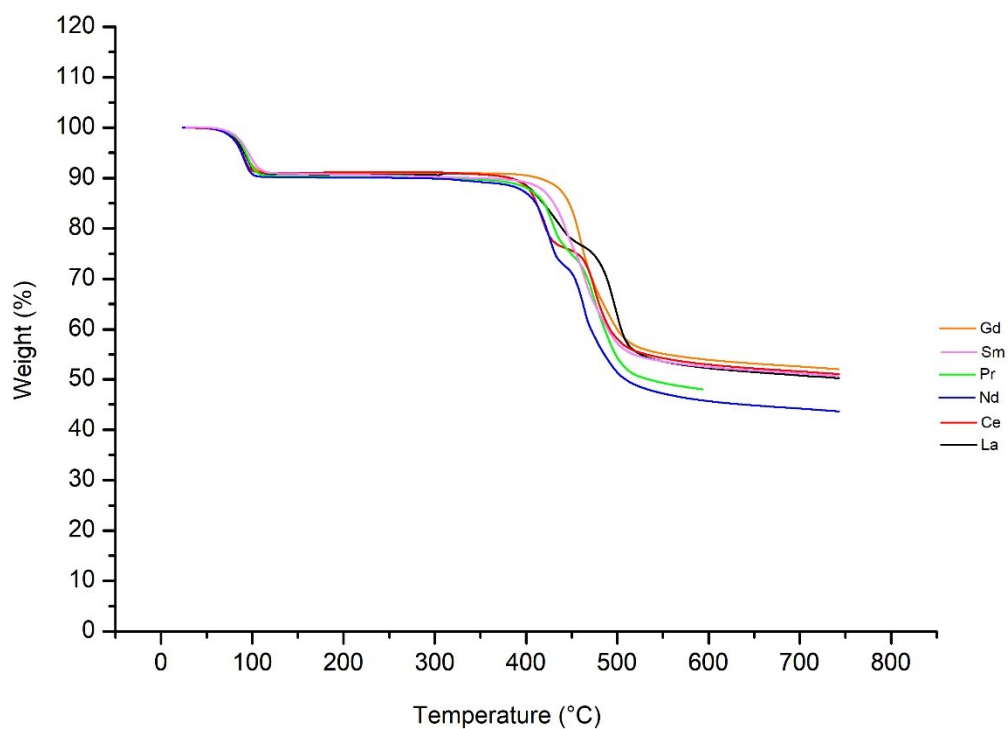

**Figure S5.** TGA plots of the  $[\text{Ln}(3\text{TPC})_3(\text{H}_2\text{O})_3]_n$  (**1a-f**) series



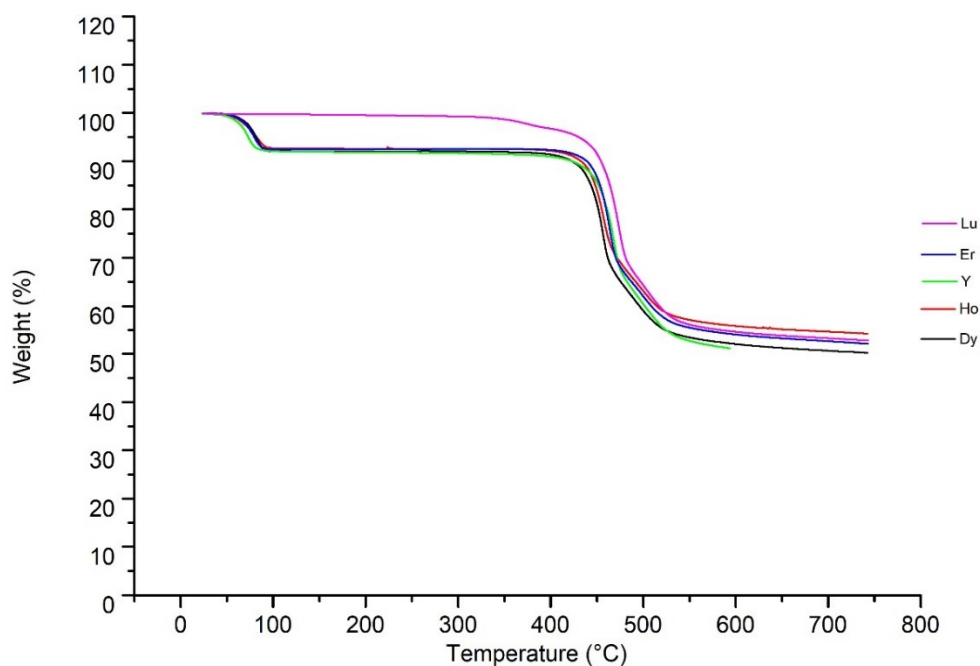

**Figure S6.** TGA plots of the  $[\text{Ln}_2(3\text{TPC})_6(\text{H}_2\text{O})_4]\cdot\text{H}_2\text{O}$  (**2a-e**) series

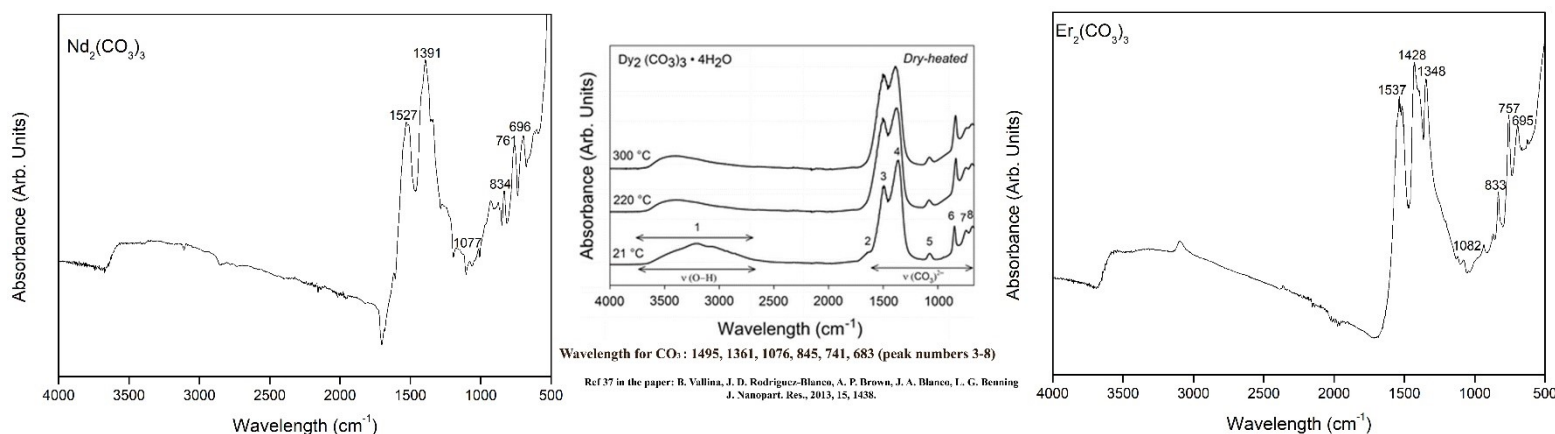

**Figure S7:** IR spectra of  $\text{Nd}_2(\text{CO}_3)_3$  (Left) from thermal decomposition of **1d**, reported  $\text{Dy}_2(\text{CO}_3)_3\cdot 4\text{H}_2\text{O}$  (middle) and  $\text{Er}_2(\text{CO}_3)_3$  (right) from thermal decomposition of **2d**

### Weight loss experiments

#### *NaCl 0.01 M control*

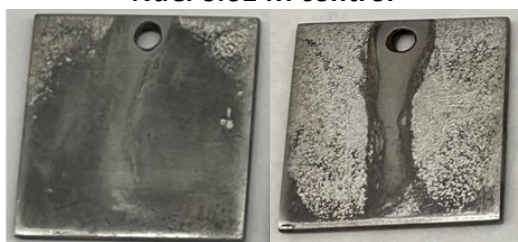

**$[Y_2(3TPC)_6(H_2O)_4] \cdot H_2O$  (2c) - 500 ppm**

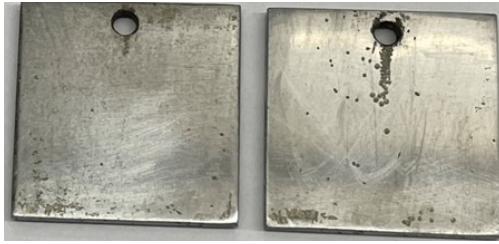

**$[Er_2(3TPC)_6(H_2O)_4] \cdot H_2O$  (2d) - 500 ppm**

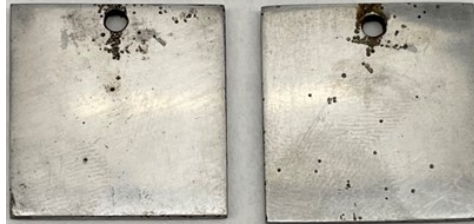

**$[Gd(3TPC)_3(H_2O)_3]_n$  (1f) - 500 ppm**

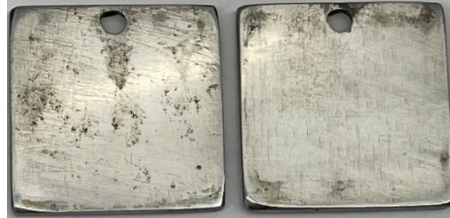

**$[La(3TPC)_3(H_2O)_3]_n$  (1a) - 500 ppm**

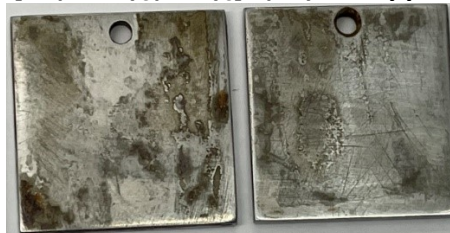

**Figure S8:** Visual comparisons pictures of few sample coupons after 7 days immersion in inhibitor solutions in NaCl 0.01M. (Left – Trial 1; right – Trial 2.)

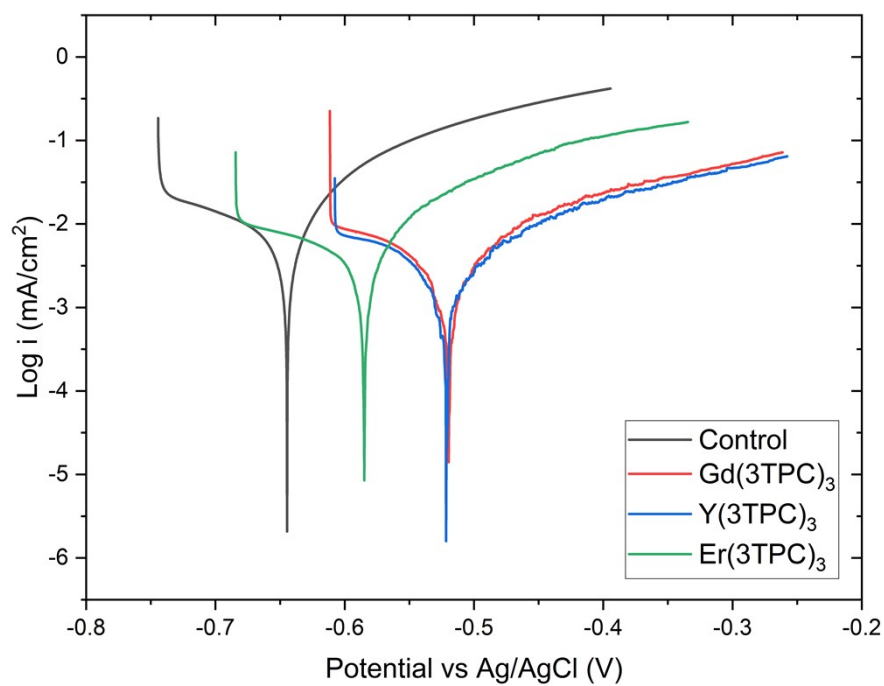

**Figure S9:** Representative potentiodynamic polarisation scans after 24 hours for 0.01 M NaCl control, and solutions with 0.01 M NaCl and 500ppm of  $[\text{Gd}(\text{3TPC})_3(\text{H}_2\text{O})_3]_n$  (**1f**),  $[\text{Y}_2(\text{3TPC})_6(\text{H}_2\text{O})_4] \cdot \text{H}_2\text{O}$  (**2c**) or  $[\text{Er}_2(\text{3TPC})_6(\text{H}_2\text{O})_4] \cdot \text{H}_2\text{O}$  (**2d**)
